1 **Bone changes assessed with High-Resolution peripheral Quantitative Computed**  
2 **Tomography (HR-pQCT) in early inflammatory arthritis: a 12-month cohort study**

3

4

5 Running Title: Bone changes in early inflammatory arthritis

6

7 Scott C. Brunet<sup>1,2\*</sup>, Stephanie Finzel<sup>3\*</sup>, MD, Klaus Engelke<sup>4</sup>, Steven K. Boyd<sup>1,2</sup>, PhD, Cheryl  
8 Barnabe, MSc, MD<sup>1,5,6</sup>, Sarah L. Manske<sup>1,2</sup>, PhD

9

10 <sup>1</sup>McCaig Institute for Bone and Joint Health, Cumming School of Medicine, University of  
11 Calgary, Calgary AB, Canada

12 <sup>2</sup>Biomedical Engineering Graduate Program and Department of Radiology, Cumming  
13 School of Medicine, University of Calgary, Calgary AB, Canada

14 <sup>3</sup>Department of Rheumatology and Clinical Immunology, Medical Center - University of  
15 Freiburg, Faculty of Medicine, University of Freiburg, Freiburg, Germany

16 <sup>4</sup>Department of Medicine, FAU University Erlangen-Nürnberg and Universitätsklinikum  
17 Erlangen, Erlangen, Germany

18 <sup>5</sup>Department of Medicine, Cumming School of Medicine, University of Calgary, Calgary  
19 AB, Canada

20 <sup>6</sup>Department of Community Health Sciences, Cumming School of Medicine, University of  
21 Calgary, Calgary AB, Canada

22

23 \*SCB and SF contributed equally to this paper.

24

25

26 **Submitted to Annals of the Rheumatic Diseases**

27

28 **Number of words in abstract: 250**

29 **Number of words in manuscript: 2991**

30 **Number of figures: 5 + 1 Supplementary Figure**

31 **Address for correspondence:**

32 Sarah Manske

33 3280 Hospital Dr NW

34 Calgary, Alberta, Canada

## Bone Changes in Early Inflammatory Arthritis

---

- 1 T2N 4Z6
- 2 Phone: 403-210-6046
- 3 Email: [smanske@ucalgary.ca](mailto:smanske@ucalgary.ca)

## Bone Changes in Early Inflammatory Arthritis

---

### 1 **ABSTRACT**

2 **Objectives:** We sought to determine the sensitivity of high resolution peripheral  
3 quantitative computed tomography (HR-pQCT) to detect change and identify erosions in  
4 comparison with conventional radiography (CR) in early inflammatory arthritis patients.  
5 We also explored which prognostic factors contribute to bone damage assessed by HR-  
6 pQCT in the first year of diagnosis.

7 **Methods:** 46 patients with arthritic symptoms less than one year, and a clinical diagnosis  
8 of inflammatory arthritis were prospectively imaged at baseline and 12-months. HR-  
9 pQCT scans of the 2<sup>nd</sup> and 3<sup>rd</sup> MCP joints and CR of the hands and feet were performed.  
10 Joint space width (JSW), total bone mineral density (Tt.BMD), erosion presence and  
11 volume were assessed with HR-pQCT. Scan-rescan precision was assessed to define an  
12 individual-level least significant change (LSC) criterion. Regression analyses explored  
13 prognostic factors for bone damage progression.

14 **Results:** We observed no significant group-level changes in JSW, Tt.BMD or erosion  
15 volume. 20% or fewer joints demonstrated individual-level changes greater than the LSC  
16 criterion for mean JSW, Tt.BMD and erosion volume. HR-pQCT detected more erosions  
17 than CR in the 2<sup>nd</sup> and 3<sup>rd</sup> MCP. Increased symptom duration at diagnosis was associated  
18 ( $p < 0.10$ ) with lower JSW minimum and higher JSW standard deviation.

19 **Conclusions:** We have demonstrated stability in erosion, bone density and JSW over 12-  
20 months in most patients receiving treatment for inflammatory arthritis using a LSC  
21 criterion, although patients with longer symptom duration prior to treatment initiation  
22 had demonstrable negative effects on JSW estimates. HR-pQCT captures bone damage  
23 and progression undetectable by CR in the imaged joints.

24

25 **KEYWORDS:** early rheumatoid arthritis, rheumatoid arthritis, bone mineral density

## Bone Changes in Early Inflammatory Arthritis

---

### 1 INTRODUCTION

2 Early diagnosis and tight monitoring of disease progression are important clinical  
3 targets in patients with inflammatory arthritis to optimize treatment response and  
4 prevent future damage.[1-3] Conventional radiographs (CR) are traditionally used to  
5 assess erosive disease and joint space loss, however may not be sufficiently sensitive to  
6 detect changes early in the disease course.

7 High-resolution peripheral quantitative computed tomography (HR-pQCT) is a  
8 highly sensitive bone imaging tool, capable of capturing 3D volumetric bone images at  
9 61 or 82  $\mu\text{m}$  nominal isotropic resolution.[4,5] Quantitative measurement techniques  
10 have been developed and validated to assess metacarpophalangeal (MCP) joint space  
11 width, erosion number and size as well as periarticular bone density and  
12 microarchitecture.[6-9] We previously found that HR-pQCT-assessed joint space width  
13 outcomes are associated with van der Heijde-modified total Sharp scores (vdHSS) from  
14 conventional radiography in patients with advanced disease.[10] These studies provide  
15 a strong rationale to investigate the use of HR-pQCT in early inflammatory arthritis  
16 patients. The initial disease course in RA is highly heterogenous;[11] predicting who  
17 may benefit from aggressive therapy is important to reduce medical risk and cost, as  
18 well as preserve function and productivity.[12] While HR-pQCT has been used to  
19 demonstrate repair effects at the group level,[13-16] to our knowledge, whether there is  
20 utility in monitoring progression with HR-pQCT in the early course of inflammatory  
21 arthritis has not been determined. Further, whether established risk factors for  
22 aggressive disease, including seropositivity, number of swollen joints and radiographic  
23 evidence of erosions [17-20] are also associated with progression of outcomes  
24 measured by HR-pQCT is not known.

## Bone Changes in Early Inflammatory Arthritis

---

1           The purposes of this study were two-fold. First, we sought to demonstrate the  
2 relative ability of HR-pQCT to identify erosions in comparison with CR. Second, we  
3 explored which factors typically associated with aggressive RA, were associated with  
4 baseline bone damage and progression assessed by HR-pQCT, in patients with a recent  
5 (< 1 month) diagnosis of early inflammatory arthritis.

## Bone Changes in Early Inflammatory Arthritis

---

### 1 **METHODS**

#### 2 **Patients**

3 We recruited 46 patients with early inflammatory arthritis (EIA) from the University of  
4 Calgary Division of Rheumatology specialty EIA clinic between 2011 and 2014. Eligible  
5 patients had experienced inflammatory arthritis symptoms for less than one year, had a  
6 clinical diagnosis of early rheumatoid arthritis (RA) or undifferentiated arthritis by a  
7 rheumatologist, and were beginning disease-modifying therapy according to standard  
8 clinical practice. All patients provided written informed consent prior to study  
9 participation. Approval for all procedures was obtained by the Conjoint Health Research  
10 Ethics Board at the University of Calgary (REB 15-0582). Study visits were conducted at  
11 baseline and 12-months. Patients were not involved in the design, conduct, reporting, or  
12 dissemination plans of our research.

13

#### 14 **Demographic and Clinical Outcomes**

15 Demographic information (age, sex, BMI, handedness, occupation, dates of symptom  
16 onset and diagnosis) were recorded. Patients were classified according to the 2010  
17 ACR/EULAR Classification for RA [21]. Laboratory diagnostics comprised rheumatoid  
18 factor (RF), anti-cyclic citrullinated peptide antibody (ACPA), C-reactive protein (CRP)  
19 and erythrocyte sedimentation rate (ESR). Disease activity assessment included tender  
20 and swollen joint counts, physician and patient global scores, duration of morning  
21 stiffness, Health Assessment Questionnaire (HAQ) scores [22] and 28-joint Disease  
22 Activity Score (DAS28).[23] Remission status (DAS28 < 2.6)[24] was also recorded as  
23 well as treatments received.

24

## Bone Changes in Early Inflammatory Arthritis

---

### 1 **Conventional Radiographs**

2 Routine conventional plain film radiographs of the hands, wrist and feet were  
3 performed. All CR were scored for erosions, joint space narrowing (JSN) and  
4 subluxation using the vdHSS by a single experienced reader from Imaging  
5 Rheumatology International (Meersan, Netherlands), blinded to all other patient  
6 data.[25] Radiographic progression was defined as a single unit increase in vdHSS  
7 score.[26]

### 9 **HR-pQCT Image Acquisition**

10 HR-pQCT scans were performed on the dominant 2<sup>nd</sup> and 3<sup>rd</sup> MCP joints secured in a  
11 custom positioning device (XtremeCT, Scanco Medical, Brüttisellen, Switzerland).[27]  
12 We obtained a scout view (coronal plane x-ray ) to identify the reference line. HR-pQCT  
13 scans are acquired in 110 slice increments (“stacks”). For the first 13 baseline scans, the  
14 reference line was placed at the distal surface of the 3<sup>rd</sup> proximal phalangeal bone  
15 covering 9 mm distal and 9 mm proximal to the line for a total of 1.8 mm (2 stacks = 220  
16 slices). For the remaining patients, to comply with the Study group for eXtreme  
17 Computed Tomography in Rheumatoid Arthritis (SPECTRA) recommendations for  
18 standard positioning which were agreed to shortly after study initiation [28] and to  
19 ensure the joint space was captured by a single acquisition, the reference line was  
20 placed on the distal surface of the 2<sup>nd</sup> or 3<sup>rd</sup> metacarpal, whichever was more distal, and  
21 the scan region of interest included 9.02 mm distal and 18.04 mm proximal to the line  
22 for a total of 2.7 cm (3 stacks or 330 slices). Images with a nominal isotropic resolution

## Bone Changes in Early Inflammatory Arthritis

---

1 of 82.0  $\mu\text{m}$  were acquired using the manufacturer's standard settings (60 kVp, 1000  $\mu\text{A}$ ,  
2 100 ms integration time).

3

### 4 **HR-pQCT Image Processing**

5 HR-pQCT image processing details are provided in Appendix 1. Briefly, we assessed  
6 total bone mineral density (Tt.BMD,  $\text{mg}/\text{cm}^3$ ) from grey-scale images. Volumetric joint  
7 space was quantified using an algorithm developed by consensus from the SPECTRA  
8 collaboration.[29] 3D JSW including mean (JSW.Mean, mm), maximum (JSW.Max, mm),  
9 minimum (JSW.Min, mm), standard deviation (JSW.SD, mm), asymmetry (defined as  
10  $\text{JSW.Asymm} = \text{ratio of JSW.Max/JSW.Min}$ , [1]) as well as volume (JSV,  $\text{mm}^3$ ) were  
11 calculated. Erosion presence was identified by a rheumatologist with extensive HR-  
12 pQCT expertise (SF). Semi-automated assessment of erosion volume was performed  
13 using the Medical Image Analysis Framework (University of Erlangen, Erlangen  
14 Germany).[9]

15

### 16 **Precision Analyses**

17 Short-term *in vivo* precision data were obtained by performing a second scan on the  
18 same day with repositioning.[30] In addition, intra-operator precision was assessed for  
19 the erosion analysis. Precision of JSW outcomes was previously reported in this cohort.  
20 [29] Here precision of erosion volume and Tt.BMD are reported.

21

### 22 **Statistical Analyses**

23 For all demographic, clinical and HR-pQCT outcomes, results are reported as mean and  
24 standard deviation (SD) unless otherwise indicated. For HR-pQCT precision, we  
25 calculated the precision error as the root-mean square standard deviation (RMSSD) and



## Bone Changes in Early Inflammatory Arthritis

---

1 the root-mean square coefficient of variation (RMSCV).[31] For erosion volume,  
2 precision was calculated separately for erosions less than 10 mm<sup>3</sup> and erosions greater  
3 than 10 mm<sup>3</sup> for comparison with previously published values.[9] In addition, the  
4 distribution of the difference between scan-rescan values were compared to determine  
5 whether they met the criteria required to compute the least-significant change (LSC) at  
6 the 95% confidence level (i.e., 2.77 x RMSSD).[32]

7 Paired Welch's t-tests were used to examine changes over time at the group level,  
8 and tested against an alpha level of 0.05. For paired differences that were not normally  
9 distributed, a paired Wilcoxon signed-rank test was used. Beeswarm plots were used to  
10 examine the heterogeneity of the data.[33] To determine whether an individual change  
11 exceeded measurement error at a 95% confidence level, the changes in mean JSW, JSV,  
12 TtBMD and erosion volume were evaluated against the LSC, as described above.[32]  
13 Using the LSC criteria, patients were classified into one of three groups for each  
14 outcome measure: improvement, stable, or progression. Based on these criteria, Fisher's  
15 exact test was used to determine whether patients with a diagnosis of RA differed from  
16 those with self-limited or undifferentiated arthritis, as well to compare patients with  
17 and without: high disease activity at baseline (DAS28 > 5.1),[34] progression to biologic  
18 therapy, and remission (DAS28 < 2.6) [24] at follow-up.

19 To understand whether HR-pQCT outcomes are associated with known prognostic  
20 factors and disease activity markers, we performed exploratory analyses using simple  
21 linear regressions to examine the relationship between prognostic factors and joint  
22 space, erosion volume and bone density. Regressions were performed for the 2<sup>nd</sup> and 3<sup>rd</sup>  
23 MCPs independently and tested against an alpha value of 0.1 due to the exploratory  
24 nature of the analyses. Linear regression relationships with an adjusted r-squared  
25 greater than zero and statistical significance across both joints were investigated

## Bone Changes in Early Inflammatory Arthritis

---

1 further. Similarly, binomial logistic regression was used to evaluate the relationship  
2 between prognostic factors and erosion presence and tested against an alpha value of  
3 0.1. These analyses were performed for both baseline HR-pQCT outcomes and change in  
4 HR-pQCT outcomes. All statistical analyses were performed using R (v3.5.3), RStudio  
5 (v1.1.463)[35] and RMarkdown.[36,37]  
6

## Bone Changes in Early Inflammatory Arthritis

---

### 1 **RESULTS**

#### 2 **Demographics and Clinical Characteristics**

3 Of the 46 patients recruited, one withdrew from the study prior to follow-up and two  
4 were lost to follow-up. Table 1 shows characteristics of the 43 patients who attended  
5 both study visits. At baseline, 33 (77%) patients met the 2010 American College of  
6 Rheumatology criteria for RA [21] and 10 (23%) were thus assessed to have  
7 undifferentiated arthritis. At 12-month follow-up, several patients were reclassified,  
8 resulting in a final distribution of 37 (86%) with RA, 2 (5%) still being assessed as  
9 having undifferentiated arthritis, 1 (2%) with Adult Onset Still's, 1 (2%) with psoriatic  
10 arthritis, and 2 (5%) with self-limited arthritis. At baseline, 4 (10%) of patients had  
11 been exposed to a conventional disease-modifying anti-rheumatic drug (cDMARD),  
12 while 38 (88%) utilized a cDMARD over the 12-month follow-up. Eleven (26%) of  
13 patients progressed to requiring a biologic DMARD (bDMARD) over the 12-month  
14 follow-up. 38 (97%) of patients had active disease ( $DAS28 \geq 2.6$ ) at baseline, while 13  
15 (35%) had active disease at follow-up, with mean reductions in the tender and swollen  
16 joint counts over one year (Table 1).

17

#### 18 **Precision**

19 Seventeen joints from 13 patients were used for precision analysis as they had at least  
20 one erosion, as well as two scans without motion artifacts acquired on the same day.  
21 Intra-rater precision of erosion volume determined as RMSSD was  $1.89 \text{ mm}^3$  for total  
22 erosion volume per joint, and  $2.52 \text{ mm}^3$  when evaluating by individual erosion volume.  
23 RMSSD for erosions  $> 10 \text{ mm}^3$  was  $3.49 \text{ mm}^3$  and for erosions  $< 10 \text{ mm}^3$  was  $1.25 \text{ mm}^3$   
24 (Table 2).

## Bone Changes in Early Inflammatory Arthritis

---

1            Analysis of scan-rescan precision revealed smaller precision errors; RMSSD was  
2    0.72 mm<sup>3</sup> for total erosion volume per joint and 1.04 mm<sup>3</sup> when evaluating by  
3    individual erosion volume. RMSSD for erosions > 10 mm<sup>3</sup> was 1.72 mm<sup>3</sup> and for  
4    erosions < 10 mm<sup>3</sup> was 0.63 mm<sup>3</sup> (Table 2). RMSSD for Tt.BMD was 11 mgHA/cm<sup>3</sup>. LSC  
5    are reported for those variables that met the required assumptions (mean JSW, JSV,  
6    total erosion volume, Tt.BMD, Table 2).

7

### 8    **Relationship between Prognostic Factors and Baseline JSW, TtBMD and Erosion**

#### 9    **Volume**

10    For quantitative analyses, 4 joints were excluded from baseline JSW, Tt.BMD and  
11    erosion volume analysis due to motion artifact or segmentation errors. Males had  
12    greater JSV (52 mm<sup>3</sup> in 2<sup>nd</sup> MCP), mean JSW (0.3 mm in 2<sup>nd</sup> MCP) and max JSW (0.1 mm  
13    in 2<sup>nd</sup> MCP) than females in both 2<sup>nd</sup> and 3<sup>rd</sup> MCPs at baseline ( $p < 0.005$ , adjusted  $R^2$   
14    varying from 0.19 to 0.69). Increased symptom duration at diagnosis was significantly  
15    associated ( $p < 0.10$ ) with lower minimum JSW (adjusted  $R^2 = 0.12$  and 0.05) suggesting  
16    that for every 100 days of symptoms, there is a 0.01 mm decrease in minimum JSW.  
17    Similarly, symptom duration was associated with increased SD of JSW (adjusted  $R^2 =$   
18    0.06 and 0.24) for 2<sup>nd</sup> and 3<sup>rd</sup> MCPs at baseline, suggesting that for every 100 days of  
19    symptoms, there is a 0.002 increase in SD. We found no significant associations between  
20    baseline age, duration of time between diagnosis and scan, BMI, seropositivity, HAQ  
21    score, patient global score, morning stiffness duration, exposure to steroids, or DAS28  
22    score and JSW, Tt.BMD or erosion volume outcomes.

23

#### 24    **HR-pQCT Comparison with Conventional Radiography**

## Bone Changes in Early Inflammatory Arthritis

---

1 Seventeen (40%) of patients had erosions identified by HR-pQCT in the 2<sup>nd</sup> or 3<sup>rd</sup> MCP  
2 at baseline. Two individuals (4%) with erosions at the 2<sup>nd</sup> or 3<sup>rd</sup> MCP were identified by  
3 CR, but HR-pQCT allowed identification of erosions in an additional 16 patients (38%)  
4 with HR-pQCT. Although HR-pQCT was more sensitive to identifying erosions at these  
5 joints, there were 11 patients (26%) with erosions captured in additional joints by CR  
6 included in the vdHSS scoring system (Figure 1). In the participant with the highest  
7 vdHSS, HR-pQCT revealed a “pseudoerosion” (i.e., no cortical break) in the 2<sup>nd</sup> MCP, but  
8 no erosions that met the SPECTRA erosion definition in the 2<sup>nd</sup> or 3<sup>rd</sup> MCP (Figure 2).

9 Minimum JSW by HR-pQCT was not associated with the vdHSS total JSN score (data  
10 not shown). One participant had a non-zero vdHSS JSN score in the 2<sup>nd</sup> or 3<sup>rd</sup> MCPs; thus  
11 a direct comparison between JSW and vdHSS joint score at these joints could not be  
12 made.

13

### 14 **Longitudinal Changes in JSW, Tt.BMD, Erosion Number and Erosion Volume by** 15 **HR-pQCT**

16 Examination of raw images found two patients who developed erosions by 12-month  
17 follow-up. After image registration, the appearance of new erosions was less convincing  
18 (Figure 3). The overall number of erosions increased from 28 to 36 between baseline  
19 and 12-month follow-up.

20 Five and three additional joints were excluded from JSW and Tt.BMD analyses at  
21 follow-up, respectively. There were no significant group-level changes in JSW, Tt.BMD  
22 or erosion volume over time at the 2<sup>nd</sup> or 3<sup>rd</sup> MCP ( $p > 0.05$ , Figure 4, Supplementary  
23 Figure 1). At the individual level, most joints did not exceed the LSC. However, four  
24 joints had decreased mean JSW and JSV, two had decreased BMD and four an increased

## Bone Changes in Early Inflammatory Arthritis

---

1 erosion volume. Five joints had increased mean JSW, four had increased JSV, two had  
2 increased BMD and 2 had decreased erosion volume (Figure 4, Figure 5).

3 Patients who had a significant change in an HR-pQCT outcome were pooled into  
4 groups of improved (n = 7), stable (n = 16) or worsened (n = 9). No patient had both an  
5 improvement and worsening. Biologic DMARD-naïve patients were more likely to  
6 worsen, while bDMARD-treated patients were more likely to improve (p = 0.02). There  
7 was no difference in progress or improvement and disease activities at baseline or  
8 follow-up. Further, patients with undifferentiated or self-limited arthritis did not  
9 progress or improve differently from those with RA. Based on exploratory linear  
10 regression analyses, there were no other significant associations between baseline  
11 clinical measures and bone changes that were consistent among both the 2<sup>nd</sup> and 3<sup>rd</sup>  
12 MCPs.

13

### 14 **Radiographic Progression**

15 Three patients increased in total vdHSS over 12-months. Of these patients, one had no  
16 HR-pQCT erosions but joint space progression on CR, one had no HR-pQCT erosions at  
17 baseline but developed one at follow-up, and one had erosions in the feet but not hands  
18 or wrists. No patient with only HR-pQCT-identified erosions showed an increase in  
19 vdHSS score.

20

## Bone Changes in Early Inflammatory Arthritis

---

### 1 **DISCUSSION**

2        In this exploratory study in an EIA-cohort, HR-pQCT identified more erosions than  
3 CR in the specific joints examined, and could better characterize mimickers of erosions,  
4 such as pseudo-erosions. Despite clinical improvement over 12-months, we observed  
5 no group level changes in HR-pQCT-measured JSW, BMD or erosion volume, supporting  
6 that stability of disease both clinically and by imaging was common in our cohort.

7        While HR-pQCT is highly sensitive to changes in the joints we examined, the limited  
8 coverage presents challenges for full-patient assessment when compared with CR.  
9 Based on the few patients (3) who sustained radiographic progression, it is challenging  
10 to draw conclusions regarding the ability of HR-pQCT to predict radiographic  
11 progression. HR-pQCT is clearly best-suited to assessing erosion volume; the evaluation  
12 of the clinical relevance of detecting more erosions and changes in erosion volume in a  
13 small number of joints or detecting fewer erosions across a large number of joints will  
14 be the subject of future studies.

15        We sought to determine the relevance of pathology detected on HR-pQCT in early  
16 inflammatory arthritis. The correlation between minimum JSW and disease duration,  
17 while not strong, is consistent with findings of decreased radiographic JSN with disease  
18 duration.[38] Biologic DMARD-treated patients were more likely to demonstrate  
19 improvement in HR-pQCT outcomes, which is consistent with previous findings  
20 demonstrating decreases in erosion volumes under biologic therapies.[13,14,16]  
21 However, we did not observe any association with HR-pQCT outcomes and disease  
22 activity. The threshold for defining a significant change was based on precision of the  
23 outcomes at the 95% confidence level. We explored defining LSC at the 80% confidence  
24 level,[39] and although altering this threshold increased the number of patients  
25 experiencing a significant change, it did not reveal any additional associations with

## Bone Changes in Early Inflammatory Arthritis

---

1 disease status. This suggests that determination of minimal clinically important  
2 differences for HR-pQCT is still required.

3 Our exploratory analysis found several prognostic factors associated with baseline  
4 HR-pQCT outcomes. The larger JSV, mean JSW and max JSW in males suggests that these  
5 outcomes are likely correlated with overall joint size. Therefore, sex and joint size may  
6 need to be considered in future HR-pQCT studies.

7 Our study has allowed us to demonstrate several technical advances in applying  
8 this imaging modality. We examined scan-rescan precision for HR-pQCT erosion and  
9 BMD analysis. Overall, the magnitude of the precision errors for erosion analysis, and  
10 poorer precision for scan-rescan than intra-rater analyses, reflect that the operator's  
11 judgement is still required to delineate the surface of the erosion. This can be partly  
12 explained by using the first segmented image to guide the second analysis for scan-  
13 rescan analyses. In contrast, intra-rater analyses were performed without the guide of  
14 the previous erosion segmentation, three months apart. The poorer intra-rater  
15 precision in this study than previously reported by Töpfer et al. [9] may also have  
16 resulted from the time delay between intra-rater analyses, differences in analysis  
17 experience, and the larger mean erosion volume in our cohort (15.4 mm<sup>3</sup> vs 9.3 mm<sup>3</sup>).  
18 The high RMSCV particularly for small erosions suggest that absolute precision errors  
19 should be reported alongside relative precision errors. And finally, with a greater  
20 number of erosions available for precision analysis, it would likely be prudent to  
21 calculate least-significant change values that are stratified by erosion size.

22 A limitation of the study was that there were a considerable number of  
23 observations that had to be discarded due to motion artifacts. Additionally, the  
24 discrepancy between new erosion identification from raw images to registered images



## Bone Changes in Early Inflammatory Arthritis

---

1 suggests that registration of baseline to follow-up HR-pQCT images is critical to  
2 investigating subtle changes in erosion presence and volume.

3 In conclusion, HR-pQCT captures bone damage and progression undetectable by CR  
4 in the imaged joints. Incorporation of image registration and less operator-dependent  
5 erosion analyses will improve the ability to monitor change at the individual level.  
6 Future studies of larger early inflammatory arthritis cohorts should investigate the  
7 minimal clinically important differences for HR-pQCT-assessed bone damage to  
8 determine what levels are associated with disease progression.

9

## 10 **ACKNOWLEDGEMENTS**

11 We thank Tessa Linkert for assistance with patient recruitment and data collection, the  
12 staff and imaging technologists at the Centre for Mobility and Joint Health for data  
13 collection, as well as Sybren de Vries and Alicia Gabilondo for assistance with image  
14 analysis. We thank Dr. Charlie Goldsmith for assistance with statistical analysis. Study  
15 funding was provided by the University of Calgary. Scott Brunet was supported by the  
16 Natural Sciences and Engineering Research Council of Canada.

## Bone Changes in Early Inflammatory Arthritis

---

### 17 **FIGURE LEGENDS**

18 Figure 1. Erosion count by HR-pQCT in MCP2 and 3 compared with vdHSS Total Erosion  
19 scores from CR at baseline. (n = 41)

20  
21 Figure 2. A) Pseudo-erosion (yellow arrow) identified in an axial HR-pQCT of the 2<sup>nd</sup> MCP.  
22 B) Corresponding conventional radiograph (CR) with the 2<sup>nd</sup> MCP erosion indicated with a  
23 black arrow.

24  
25 Figure 3. Axial HR-pQCT images of the 2<sup>nd</sup> phalangeal base demonstrating an apparent new  
26 erosion development over the 12-month follow-up. Image registration and transformation  
27 of the baseline image to align with the 12-month follow-up image suggests that the  
28 observation of a new erosion was likely artifactual. Arrow indicates the location of the  
29 cortical break.

30  
31 Figure 4. 12-month changes in Mean JSW, JSV, TtBMD and Total Erosion Volume in the 2<sup>nd</sup>  
32 MCP and 3<sup>rd</sup> MCPs. Solid lines represent mean and inter-quartile range (IQR). Dashed lines  
33 represent least significant change (LSC).

34  
35 Figure 5. Axial HR-pQCT images of the 2<sup>nd</sup> metacarpal demonstrating an erosion that  
36 increased in volume greater than the least significant change criterion. The 12-month  
37 follow-up image was registered and transformed to align with the baseline image to  
38 visually confirm the erosion change.

39  
40 Supplementary Figure 1. 12-month changes in minimum, maximum, SD and asymmetry of  
41 JSW. Solid lines represent mean and inter-quartile range (IQR). Dashed lines represent  
42 least significant change (LSC).

43  
44  
45

46 **TABLES**

47 Table 1. Characteristics of cohort. Mean (SD) for continuous variables. P-values represent significance levels for paired t-tests (\*) or  
 48 Wilcoxon paired signed-rank test (#) comparing baseline to 12-month follow-up. BMI = body mass index, DAS-28 = disease activity  
 49 score with 28 joint count, HAQ = Health Assessment Questionnaire, AM = morning, cDMARD = conventional disease modifying anti-  
 50 rheumatic drug, bDMARD = biologic DMARD, RF = rheumatoid factor, ACPA = anti-cyclic citrullinated peptide antibody, ESR =  
 51 erythrocyte sedimentation rate, CRP = c-reactive protein. (n = 43).

|                                | Baseline    | 12-month Follow-up | p-value  |
|--------------------------------|-------------|--------------------|----------|
| Age (years)                    | 46.4 (14.8) | -                  |          |
| Sex (female:male)              | 29:14       | -                  |          |
| BMI (kg/m <sup>2</sup> )       | 27.5 (6.5)  | -                  |          |
| Symptom Duration (days)        | 200 (118)   | -                  |          |
| Diagnosis Duration (days)      | 33 (47)     | -                  |          |
| <b>Clinical</b>                |             |                    |          |
| DAS-28                         | 5.3 (1.2)   | 2.3 (1.1)          | < 0.001* |
| 28 Swollen Joint Count         | 10 (7)      | 1 (3)              | < 0.001* |
| 28 Tender Joint Count          | 11 (8)      | 1 (3)              | < 0.001# |
| HAQ (0-3)                      | 1.2 (0.7)   | 0.5 (0.5)          | < 0.001* |
| Patient Global Score (0 -100)  | 55 (23)     | 24 (19)            | < 0.001* |
| Duration of AM stiffness (min) | 141 (140)   | 34 (49)            | < 0.001# |
| Remission (DAS28 < 2.6)        | 1/39 (3%)   | 13/37 (35%)        |          |
| Use of cDMARDs                 | 4/42 (10%)  | 38/43 (88%)        |          |
| Use of steroids                | 13/42 (31%) | 18/43 (42%)        |          |
| Use of bDMARDs                 | 0           | 11/43 (26%)        |          |
| <b>Serological</b>             |             |                    |          |
| RF+                            | 19/42 (45%) | -                  |          |
| ACPA+                          | 28/40 (70%) | -                  |          |
| ESR (mm/hr, normal < 20)       | 24.7 (18.8) | 11.0 (10.0)        | < 0.001# |
| CRP (mg/L, normal < 8)         | 22.0 (47.5) | 5.1 (11.0)         | < 0.001# |

53 Table 2. Precision errors calculated for scan-rescan results with repositioning. Intra-rater  
 54 precision is also presented for erosion volume. JSW precision was previously reported in  
 55 this cohort in [29]. SD = standard deviation, AS = asymmetry. n = 42 joints for JSW, 30 for  
 56 Tt.BMD and 17 for Erosion Volume. LSC values are noted as missing (-) when the  
 57 measurements failed to reach the criteria to calculate the LSC at the 95% confidence  
 58 interval.

|                                                  | Scan-Rescan |           |      | Intra-Rater |           |     |
|--------------------------------------------------|-------------|-----------|------|-------------|-----------|-----|
|                                                  | RMSSD       | RMSCV (%) | LSC  | RMSSD       | RMSCV (%) | LSC |
| JSW                                              |             |           |      |             |           |     |
| Mean (mm)                                        | 0.06        | 3.6       | 0.18 |             |           |     |
| Volume (mm <sup>3</sup> )                        | 4.26        | 4.3       | 11.8 |             |           |     |
| Minimum (mm)                                     | 0.25        | 26.2      | -    |             |           |     |
| Maximum (mm)                                     | 0.09        | 3.1       | -    |             |           |     |
| SD (mm)                                          | 0.04        | 11.1      | -    |             |           |     |
| AS (1)                                           | 2.1         | 53.7      | -    |             |           |     |
| Tt.BMD (mg HA/cm <sup>3</sup> )                  | 11          | 3.6       | 30   |             |           |     |
| Erosion Volume                                   |             |           |      |             |           |     |
| Total Erosion Volume (mm <sup>3</sup> )          | 0.72        | 4.1       | 2.0  | 1.89        | 10.1      | -   |
| Individual Erosion (mm <sup>3</sup> )            | 1.04        | 7.6       | -    | 2.52        | 15.9      | -   |
| Erosions < 10 mm <sup>3</sup> (mm <sup>3</sup> ) | 0.63        | 18.7      | -    | 1.25        | 38.4      | -   |
| Erosions > 10 mm <sup>3</sup> (mm <sup>3</sup> ) | 1.72        | 4.1       | -    | 3.49        | 11.2      | -   |

60  
61

62 **REFERENCES**

- 63 1 Cush JJ. Early rheumatoid arthritis -- is there a window of opportunity? *J Rheumatol*  
64 *Suppl* 2007;**80**:1-7.
- 65 2 Lard LR, Visser H, Speyer I, *et al.* Early versus delayed treatment in patients with  
66 recent-onset rheumatoid arthritis: comparison of two cohorts who received different  
67 treatment strategies. *Am J Med* 2001;**111**:446-51.
- 68 3 Korpela M, Laasonen L, Hannonen P, *et al.* Retardation of joint damage in patients with  
69 early rheumatoid arthritis by initial aggressive treatment with disease-modifying  
70 antirheumatic drugs: five-year experience from the FIN-RACo study. 2004;**50**:2072-  
71 81. doi:10.1002/art.20351
- 72 4 Manske SL, Zhu Y, Sandino C, *et al.* Human trabecular bone microarchitecture can be  
73 assessed independently of density with second generation HR-pQCT. *Bone*  
74 2015;**79**:213-21. doi:10.1016/j.bone.2015.06.006
- 75 5 Boutroy S, Bouxsein ML, Munoz F, *et al.* In vivo assessment of trabecular bone  
76 microarchitecture by high-resolution peripheral quantitative computed tomography. *J*  
77 *Clin Endocrinol Metab* 2005;**90**:6508-15. doi:10.1210/jc.2005-1258
- 78 6 Burghardt AJ, Lee CH, Kuo D, *et al.* Quantitative in vivo HR-pQCT imaging of 3D wrist  
79 and metacarpophalangeal joint space width in rheumatoid arthritis. 2013;**41**:2553-  
80 64. doi:10.1007/s10439-013-0871-x
- 81 7 Barnabe C, Szabo E, Martin L, *et al.* Quantification of small joint space width,  
82 periarticular bone microstructure and erosions using high-resolution peripheral  
83 quantitative computed tomography in rheumatoid arthritis. *Clin Exp Rheumatol*  
84 2013;**31**:243-50.
- 85 8 Peters M, Scharmga A, van Tubergen A, *et al.* The Reliability of a Semi-automated  
86 Algorithm for Detection of Cortical Interruptions in Finger Joints on High Resolution  
87 CT Compared to MicroCT. *Calcif Tissue Int* 2017;:1-9. doi:10.1007/s00223-017-0264-  
88 5
- 89 9 Töpfer D, Finzel S, Museyko O, *et al.* Segmentation and quantification of bone erosions  
90 in high-resolution peripheral quantitative computed tomography datasets of the  
91 metacarpophalangeal joints of patients with rheumatoid arthritis. *Rheumatology*  
92 (*Oxford*) 2014;**53**:65-71. doi:10.1093/rheumatology/ket259
- 93 10 Manske SL, Brunet SC, Finzel S, *et al.* The SPECTRA Collaboration OMERACT Working  
94 Group: Criterion Validity of Joint Space Outcomes with High Resolution Peripheral  
95 Quantitative Computed Tomography. *J Rheumatol* 2019;:jrheum.180870.  
96 doi:10.3899/jrheum.180870

- 97 11 Barnabe C, Sun Y, Boire G, *et al.* Heterogeneous Disease Trajectories Explain Variable  
98 Radiographic, Function and Quality of Life Outcomes in the Canadian Early Arthritis  
99 Cohort (CATCH). *PLoS ONE* 2015;**10**:e0135327. doi:10.1371/journal.pone.0135327
- 100 12 Skapenko A, Prots I, Schulze-Koops H. Prognostic factors in rheumatoid arthritis in the  
101 era of biologic agents. *Nat Rev Rheumatol* 2009;**5**:491–6.  
102 doi:10.1038/nrrheum.2009.157
- 103 13 Finzel S, Rech J, Schmidt S, *et al.* Repair of bone erosions in rheumatoid arthritis  
104 treated with tumour necrosis factor inhibitors is based on bone apposition at the base  
105 of the erosion. *Ann Rheum Dis* 2011;**70**:1587–93. doi:10.1136/ard.2010.148395
- 106 14 Shimizu T, Choi HJ, Heilmeyer U, *et al.* Assessment of 3-month changes in bone  
107 microstructure under anti-TNF $\alpha$  therapy in patients with rheumatoid arthritis using  
108 high-resolution peripheral quantitative computed tomography (HR-pQCT). *Arthritis  
109 Res Ther* 2017;**19**:222. doi:10.1186/s13075-017-1430-x
- 110 15 Yue J, Griffith JF, Xiao F, *et al.* Repair of Bone Erosion in Rheumatoid Arthritis by  
111 Denosumab: A High-Resolution Peripheral Quantitative Computed Tomography Study.  
112 *Arthritis Care Res (Hoboken)* 2017;**69**:1156–63. doi:10.1002/acr.23133
- 113 16 Finzel S, Rech J, Schmidt S, *et al.* Interleukin-6 receptor blockade induces limited repair  
114 of bone erosions in rheumatoid arthritis: a micro CT study. *Ann Rheum Dis*  
115 2013;**72**:396–400. doi:10.1136/annrheumdis-2011-201075
- 116 17 Fautrel B, Granger B, Combe B, *et al.* Matrix to predict rapid radiographic progression  
117 of early rheumatoid arthritis patients from the community treated with methotrexate  
118 or leflunomide: results from the ESPOIR cohort. *Arthritis Res Ther* 2012;**14**:R249.  
119 doi:10.1186/ar4092
- 120 18 Visser K, Goekoop-Ruiterman YPM, de Vries-Bouwstra JK, *et al.* A matrix risk model for  
121 the prediction of rapid radiographic progression in patients with rheumatoid arthritis  
122 receiving different dynamic treatment strategies: post hoc analyses from the BeSt  
123 study. *Ann Rheum Dis* 2010;**69**:1333–7. doi:10.1136/ard.2009.121160
- 124 19 Machold KP, Stamm TA, Nell VPK, *et al.* Very recent onset rheumatoid arthritis: clinical  
125 and serological patient characteristics associated with radiographic progression over  
126 the first years of disease. *Rheumatology (Oxford)* 2007;**46**:342–9.  
127 doi:10.1093/rheumatology/kel237
- 128 20 Dixey J, Solymossy C, Young A, *et al.* Is it possible to predict radiological damage in  
129 early rheumatoid arthritis (RA)? A report on the occurrence, progression, and  
130 prognostic factors of radiological erosions over the first 3 years in 866 patients from  
131 the Early RA Study (ERAS). *J Rheumatol Suppl* 2004;**69**:48–54.

- 132 21 Aletaha D, Neogi T, Silman AJ, *et al.* 2010 Rheumatoid arthritis classification criteria:  
133 an American College of Rheumatology/European League Against Rheumatism  
134 collaborative initiative. 2010;**62**:2569–81. doi:10.1002/art.27584
- 135 22 Bruce B, Fries JF. The Health Assessment Questionnaire (HAQ). *Clin Exp Rheumatol*  
136 2005;**23**:S14–8.
- 137 23 Wells G, Becker J-C, Teng J, *et al.* Validation of the 28-joint Disease Activity Score  
138 (DAS28) and European League Against Rheumatism response criteria based on C-  
139 reactive protein against disease progression in patients with rheumatoid arthritis, and  
140 comparison with the DAS28 based on erythrocyte sedimentation rate. *Ann Rheum Dis*  
141 2009;**68**:954–60. doi:10.1136/ard.2007.084459
- 142 24 Fransen J, van Riel PLCM. DAS remission cut points. *Clin Exp Rheumatol* 2006;**24**:S-  
143 29–32.
- 144 25 van der Heijde D, Paulus H, Shekelle P. How to read radiographs according to the  
145 Sharp/van der Heijde method. Discussion : Heterogeneity in rheumatoid arthritis  
146 radiographic trials. Issues to consider in a metaanalysis. *J Rheumatol* 2000;**27**:261–3.
- 147 26 Krabben A, Stomp W, van Nies JAB, *et al.* MRI-detected subclinical joint inflammation is  
148 associated with radiographic progression. *Ann Rheum Dis* 2014;**73**:2034–7.  
149 doi:10.1136/annrheumdis-2014-205208
- 150 27 Barnabe C, Buie H, Kan M, *et al.* Reproducible metacarpal joint space width  
151 measurements using 3D analysis of images acquired with high-resolution peripheral  
152 quantitative computed tomography. *Med Eng Phys* 2013;**35**:1540–4.  
153 doi:10.1016/j.medengphy.2013.04.003
- 154 28 Barnabe C, Feehan L, SPECTRA (Study Group for XTrEme-CT in RA). High-resolution  
155 peripheral quantitative computed tomography imaging protocol for  
156 metacarpophalangeal joints in inflammatory arthritis: the SPECTRA collaboration. *J*  
157 *Rheumatol* 2012;**39**:1494–5. doi:10.3899/jrheum.120218
- 158 29 Stok KS, Burghardt AJ, Boutroy S, *et al.* Consensus approach for 3D joint space width of  
159 metacarpophalangeal joints of rheumatoid arthritis patients using high-resolution  
160 peripheral quantitative computed tomography. *Quant Imaging Med Surg*
- 161 30 International Society for Clinical Densitometry Committee on Standards of Bone  
162 Measurement. 2015 ISCD Official Positions - Adult. Published Online First:  
163 2015.<http://www.iscd.org/official-positions/2015-iscd-official-positions-adult/>
- 164 31 Glüer CC, Blake G, Lu Y, *et al.* Accurate assessment of precision errors: how to measure  
165 the reproducibility of bone densitometry techniques. *Osteoporos Int* 1995;**5**:262–70.
- 166 32 Glüer CC. Monitoring skeletal changes by radiological techniques. *J Bone Miner Res*  
167 1999;**14**:1952–62. doi:10.1359/jbmr.1999.14.11.1952



- 168 33 Eklund A. beeswarm. <http://www.cbs.dtu.dk/eklundbeeswarm>.
- 169 34 Prevoo ML, van 't Hof MA, Kuper HH, *et al.* Modified disease activity scores that include  
170 twenty-eight-joint counts. Development and validation in a prospective longitudinal  
171 study of patients with rheumatoid arthritis. 1995;**38**:44–8.
- 172 35 Team RS. RStudio: Integrated Development for R. RStudio, Inc.  
173 2015.<http://www.rstudio.com/> (accessed 26 Apr2019).
- 174 36 Allaire JJ, Xie Y, McPherson J, *et al.* rmarkdown: Dynamic Documents for R. R package  
175 version 1.12. 2019.<https://rmarkdown.rstudio.com> (accessed 26 Apr2019).
- 176 37 Xie Y, Allaire JJ, Golemund G. *R Markdown: The Definitive Guide*. Chapman and  
177 Hall/CRC 2018. <https://bookdown.org/yihui/rmarkdown>
- 178 38 Fuchs HA, Kaye JJ, Callahan LF, *et al.* Evidence of significant radiographic damage in  
179 rheumatoid arthritis within the first 2 years of disease. *J Rheumatol* 1989;**16**:585–91.
- 180 39 Navarro-Compán V, van der Heijde D, Ahmad HA, *et al.* Measurement error in the  
181 assessment of radiographic progression in rheumatoid arthritis (RA) clinical trials: the  
182 smallest detectable change (SDC) revisited. *Ann Rheum Dis* 2014;**73**:1067–70.  
183 doi:10.1136/annrheumdis-2012-202939

184

Figure 1

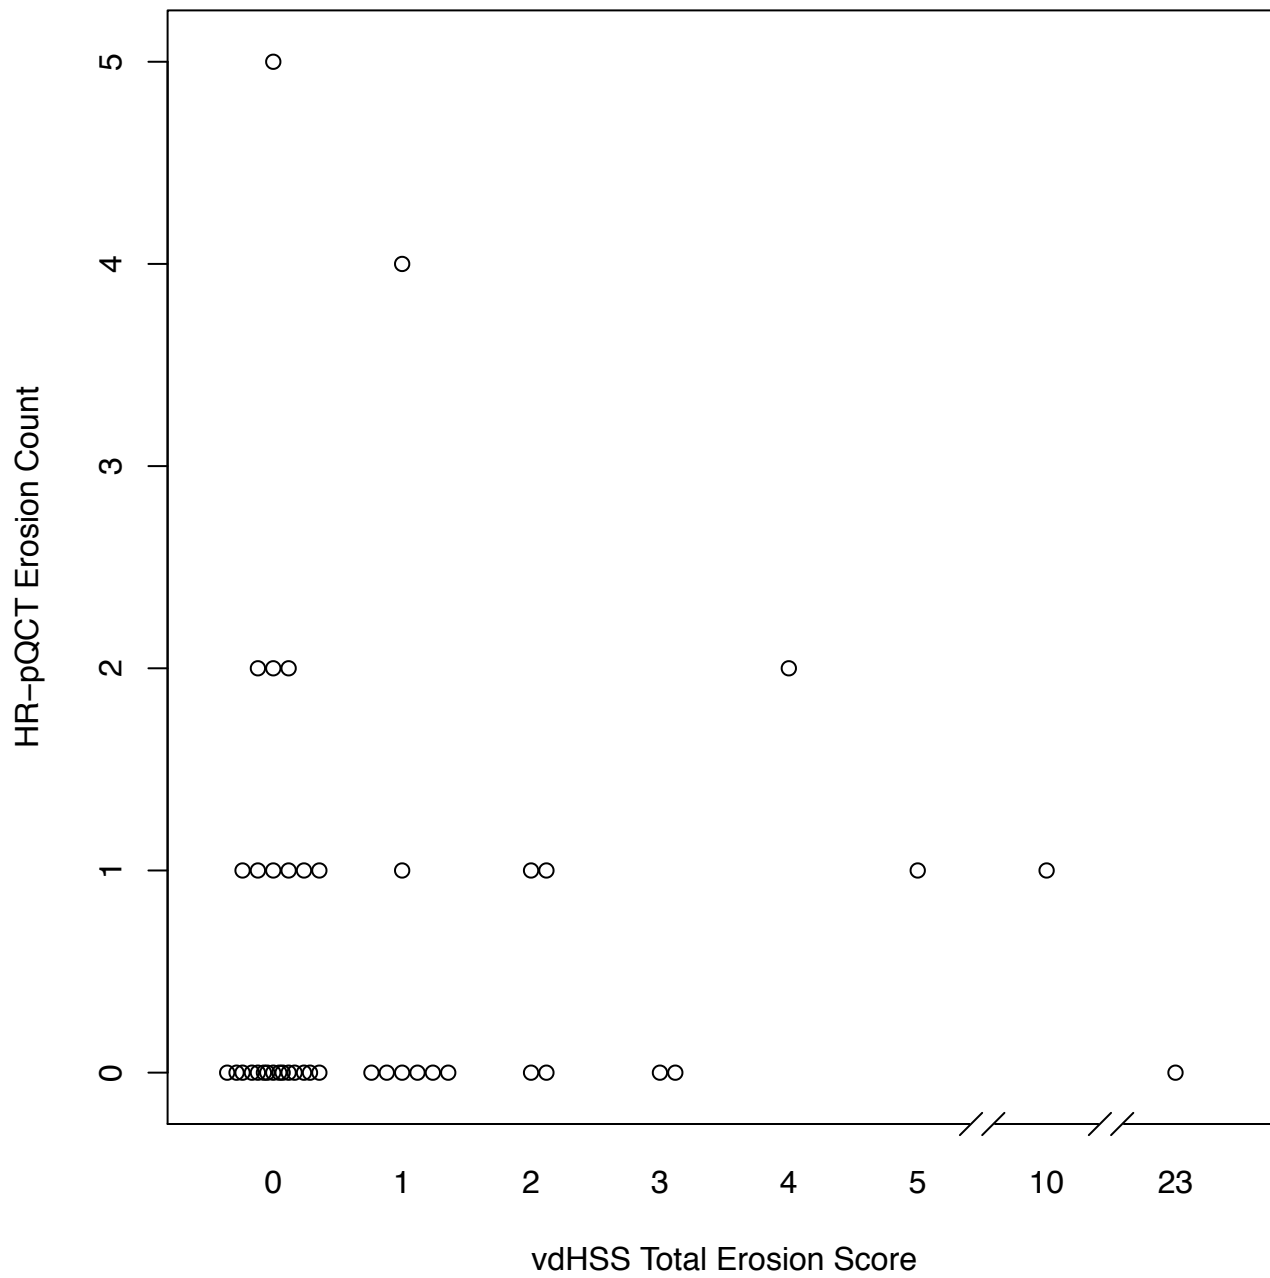

Figure 2

A) HR-pQCT

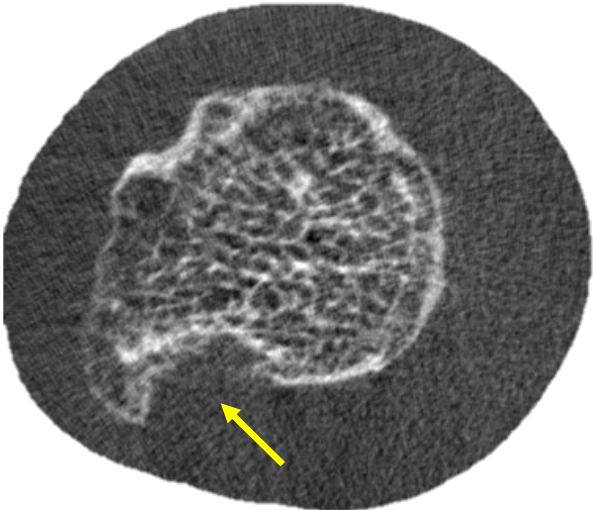

B) CR

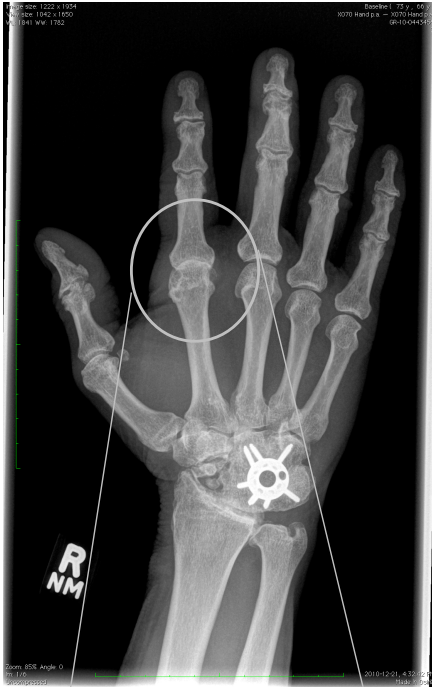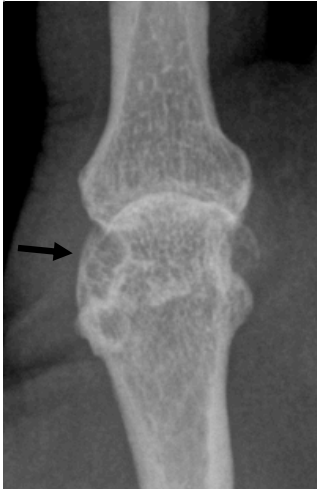

Figure 3

A) Baseline

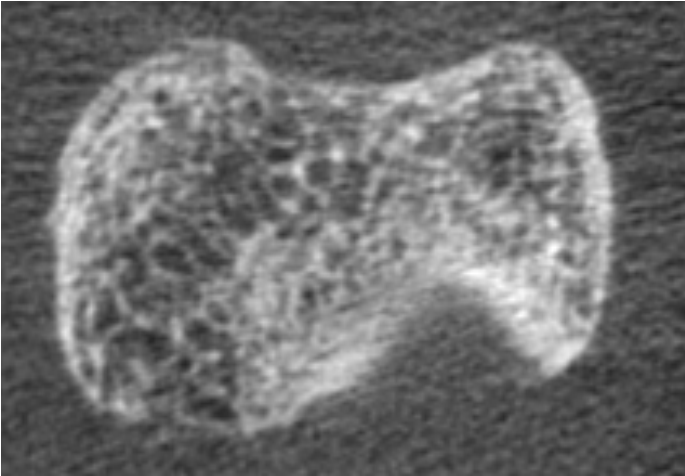

B) 12-month follow-up

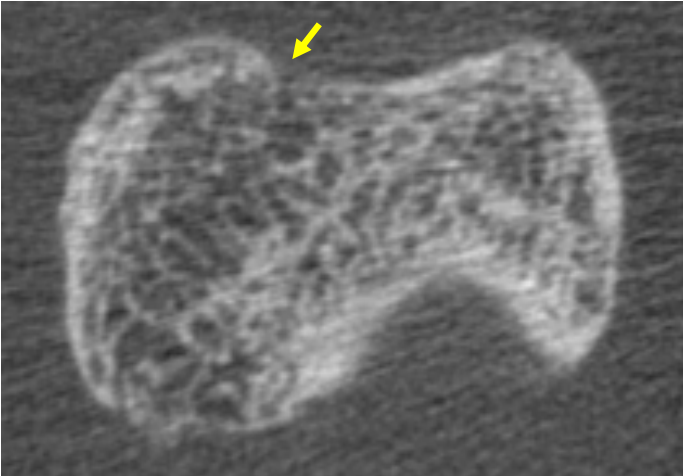

C) Baseline aligned with follow-up image

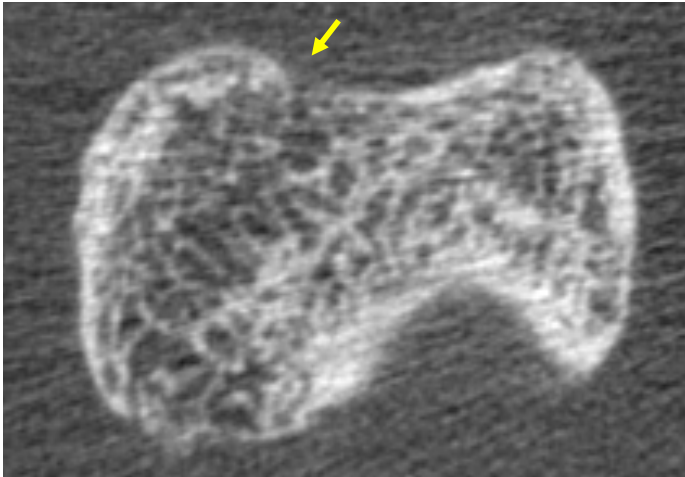

Figure 4

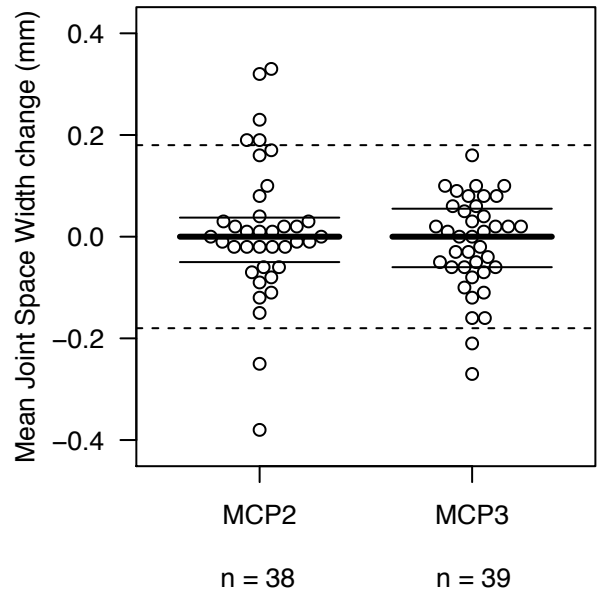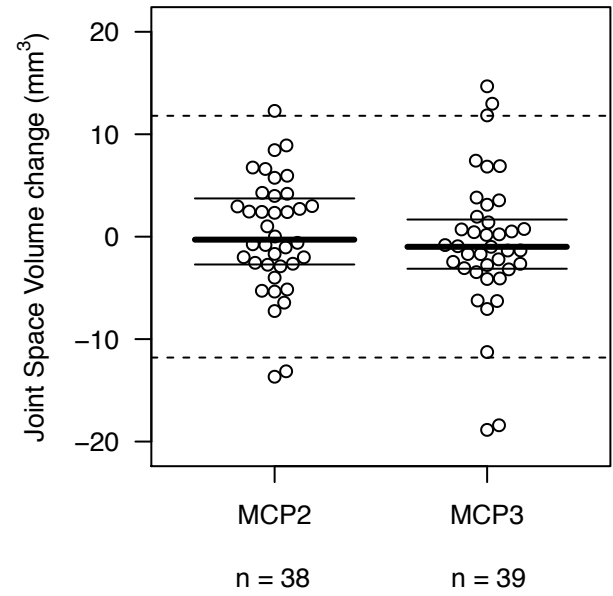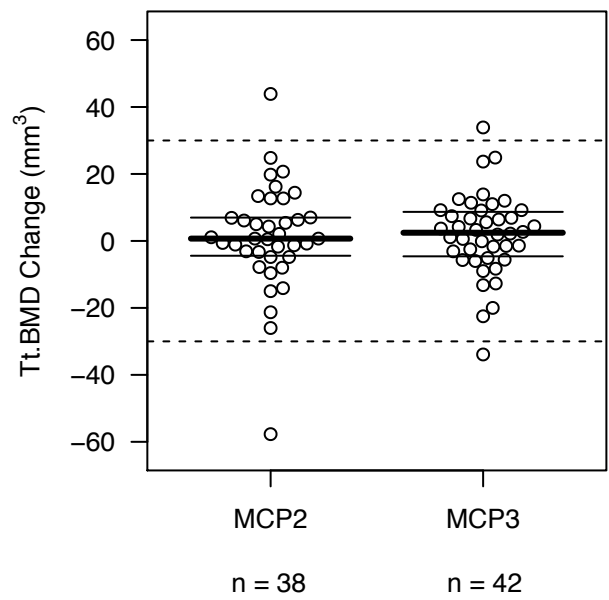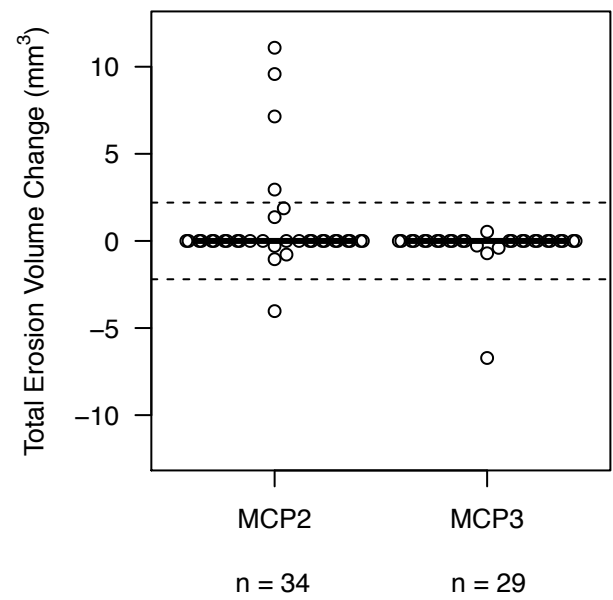

Figure 5

A) Baseline

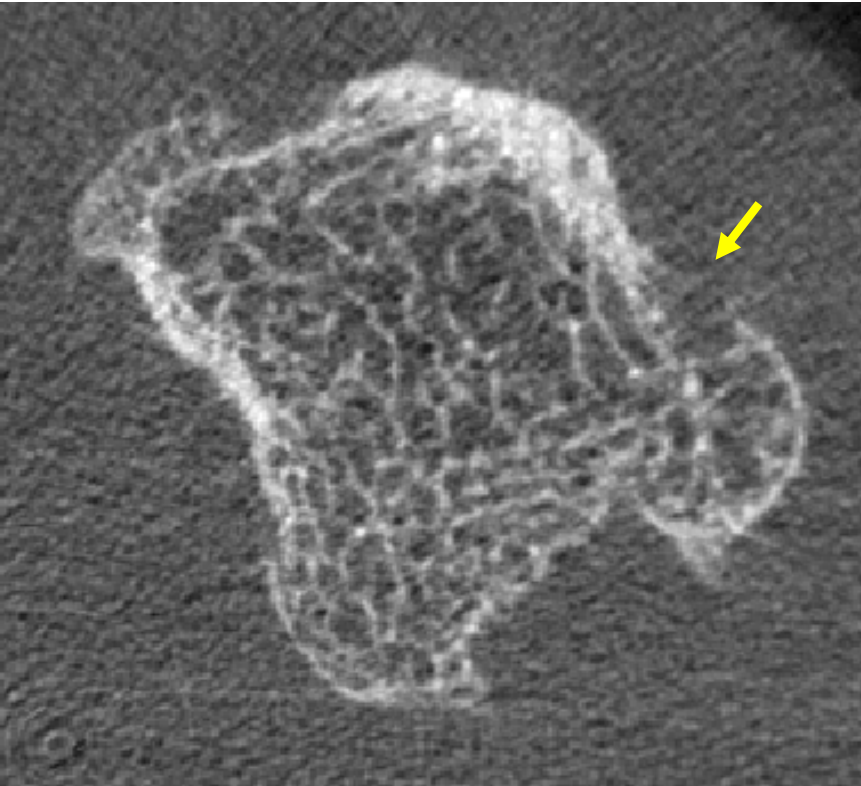

B) 12-month follow-up

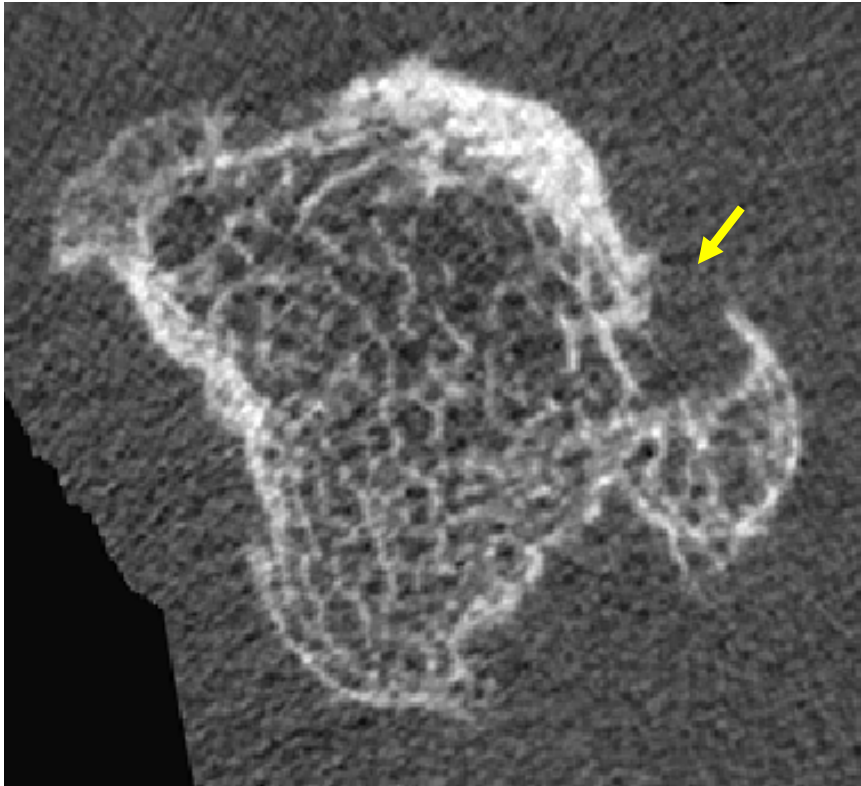

Source: https://www.medrxiv.org/content/medrxiv/early/2019/12/27/2019.12.20.19015537.full.pdf
